# Supplementary material for: Extracellular miRNAs as Predictive Biomarkers for Glypican-3-Derived Peptide Vaccine Therapy Response in Ovarian Clear Cell Carcinoma
Source: PubMed Central journal article supplement (PMC7867082; doi:10.3390/cancers13030550), 2021-02-01
Supplement: cancers-13-00550-s001.pdf [file cancers-13-00550-s001.pdf]

**Table S1.** Responsive > unresponsive in remission group (32 miRNAs of absolute fold change > 2)

|             | Responsive |     |     |     |     |      | Unresponsive |     |     |     |     |     |     | Average<br>(R1-5,<br>R7) | Average<br>(P8-14) | Fold change<br>{Average(R1-<br>5,R7)+1/Average(R8-<br>14)+1} |
|-------------|------------|-----|-----|-----|-----|------|--------------|-----|-----|-----|-----|-----|-----|--------------------------|--------------------|--------------------------------------------------------------|
|             | R1         | R2  | R3  | R4  | R5  | R7   | R8           | R9  | R10 | R11 | R12 | R13 | R14 |                          |                    |                                                              |
| miR-4497    | 104        | 19  | 0   | 0   | 0   | 26   | 0            | 0   | 0   | 0   | 0   | 0   | 0   | 25                       | 0                  | 25.80                                                        |
| miR-365a-3p | 0          | 9   | 0   | 0   | 23  | 129  | 0            | 6   | 0   | 0   | 0   | 8   | 0   | 27                       | 2                  | 9.26                                                         |
| miR-206     | 0          | 206 | 160 | 67  | 196 | 8559 | 0            | 199 | 60  | 556 | 298 | 264 | 113 | 1531                     | 213                | 7.17                                                         |
| miR-193b-5p | 139        | 47  | 534 | 67  | 60  | 52   | 14           | 35  | 23  | 19  | 23  | 33  | 30  | 150                      | 25                 | 5.76                                                         |
| miR-1228-5p | 35         | 37  | 445 | 80  | 53  | 233  | 32           | 41  | 23  | 19  | 23  | 33  | 15  | 147                      | 26                 | 5.39                                                         |
| miR-433-3p  | 104        | 9   | 53  | 13  | 0   | 0    | 9            | 0   | 0   | 19  | 0   | 8   | 0   | 30                       | 5                  | 5.07                                                         |
| miR-365a-5p | 139        | 19  | 36  | 0   | 23  | 0    | 0            | 0   | 0   | 37  | 0   | 16  | 0   | 36                       | 8                  | 4.28                                                         |
| miR-139-3p  | 660        | 280 | 534 | 308 | 286 | 543  | 46           | 164 | 60  | 74  | 140 | 156 | 105 | 435                      | 107                | 4.06                                                         |
| miR-485-5p  | 139        | 47  | 71  | 27  | 45  | 78   | 0            | 41  | 8   | 37  | 18  | 25  | 8   | 68                       | 19                 | 3.38                                                         |

|             |        |       |        |        |       |       |      |       |       |       |       |       |       |        |       |      |
|-------------|--------|-------|--------|--------|-------|-------|------|-------|-------|-------|-------|-------|-------|--------|-------|------|
| miR-1-3p    | 35     | 224   | 36     | 13     | 75    | 6361  | 27   | 468   | 45    | 723   | 269   | 371   | 436   | 1124   | 334   | 3.36 |
| miR-193a-5p | 1217   | 1477  | 1655   | 777    | 467   | 1319  | 370  | 567   | 280   | 408   | 315   | 321   | 286   | 1152   | 364   | 3.16 |
| miR-483-5p  | 487    | 93    | 498    | 147    | 136   | 207   | 110  | 70    | 38    | 93    | 47    | 82    | 135   | 261    | 82    | 3.16 |
| miR-122-5p  | 161314 | 48863 | 357597 | 107942 | 70872 | 83911 | 5282 | 47704 | 71425 | 56987 | 64655 | 44617 | 44182 | 138416 | 47836 | 2.89 |
| miR-874-3p  | 0      | 19    | 0      | 0      | 8     | 129   | 18   | 23    | 0     | 0     | 0     | 16    | 0     | 26     | 8     | 2.89 |
| miR-320c    | 660    | 439   | 1264   | 255    | 249   | 362   | 242  | 199   | 159   | 278   | 146   | 206   | 75    | 538    | 186   | 2.88 |
| miR-122b-3p | 68891  | 22674 | 117995 | 48332  | 21073 | 31134 | 3009 | 19174 | 23163 | 25424 | 21762 | 19072 | 16802 | 51683  | 18344 | 2.82 |
| miR-184     | 209    | 159   | 89     | 121    | 53    | 5689  | 55   | 269   | 15    | 538   | 257   | 288   | 1210  | 1053   | 376   | 2.80 |
| miR-320d    | 174    | 65    | 249    | 67     | 30    | 52    | 32   | 35    | 8     | 93    | 6     | 74    | 23    | 106    | 39    | 2.71 |
| miR-23a-5p  | 0      | 56    | 107    | 54     | 0     | 26    | 23   | 23    | 0     | 19    | 0     | 8     | 30    | 40     | 15    | 2.63 |
| miR-150-5p  | 313    | 290   | 160    | 737    | 429   | 1060  | 137  | 117   | 144   | 74    | 228   | 206   | 459   | 498    | 195   | 2.55 |
| miR-99b-3p  | 70     | 65    | 107    | 94     | 8     | 78    | 27   | 64    | 30    | 0     | 35    | 16    | 23    | 70     | 28    | 2.45 |
| miR-        | 3163   | 2290  | 3559   | 1326   | 949   | 1241  | 1043 | 1151  | 582   | 1131  | 666   | 988   | 556   | 2088   | 874   | 2.39 |

|              |      |      |      |      |      |      |     |     |      |      |      |      |      |      |      |      |
|--------------|------|------|------|------|------|------|-----|-----|------|------|------|------|------|------|------|------|
| 320b         |      |      |      |      |      |      |     |     |      |      |      |      |      |      |      |      |
| miR-190b-5p  | 0    | 19   | 0    | 0    | 23   | 181  | 14  | 6   | 8    | 37   | 18   | 16   | 8    | 37   | 15   | 2.36 |
| miR-505-3p   | 0    | 19   | 18   | 13   | 45   | 129  | 14  | 6   | 15   | 37   | 12   | 16   | 8    | 37   | 15   | 2.35 |
| miR-6852-5p  | 174  | 47   | 18   | 40   | 23   | 129  | 18  | 64  | 15   | 0    | 41   | 66   | 8    | 72   | 30   | 2.33 |
| miR-127-3p   | 626  | 93   | 231  | 429  | 105  | 1603 | 101 | 228 | 318  | 204  | 309  | 288  | 105  | 515  | 222  | 2.31 |
| miR-92b-5p   | 209  | 37   | 142  | 67   | 128  | 26   | 59  | 0   | 106  | 19   | 82   | 25   | 15   | 102  | 44   | 2.30 |
| miR-375-3p   | 5005 | 1748 | 1388 | 3282 | 2818 | 3051 | 375 | 742 | 1444 | 1317 | 2190 | 1581 | 1398 | 2882 | 1292 | 2.23 |
| miR-1273h-3p | 35   | 84   | 107  | 54   | 45   | 103  | 18  | 23  | 8    | 56   | 12   | 74   | 45   | 71   | 34   | 2.09 |
| miR-181a-3p  | 0    | 47   | 107  | 0    | 0    | 0    | 18  | 18  | 0    | 0    | 0    | 16   | 30   | 26   | 12   | 2.08 |
| miR-4433a-3p | 243  | 112  | 89   | 40   | 30   | 362  | 73  | 64  | 0    | 148  | 29   | 156  | 30   | 146  | 72   | 2.03 |
| miR-146b-3p  | 104  | 9    | 53   | 40   | 30   | 78   | 5   | 41  | 0    | 56   | 6    | 41   | 30   | 52   | 25   | 2.02 |

**Table S2.** Unresponsive > responsive in remission group (45 miRNAs of absolute fold change < 0.5)

|             | Responsive |      |      |      |      |      | Unresponsive |      |      |       |      |       |       | Average<br>(R1-5, R7) | Average<br>(P8-14) | Fold change<br>{Average(R1-5,R7)+1/Average(R8-14)+1} |
|-------------|------------|------|------|------|------|------|--------------|------|------|-------|------|-------|-------|-----------------------|--------------------|------------------------------------------------------|
|             | R1         | R2   | R3   | R4   | R5   | R7   | R8           | R9   | R10  | R11   | R12  | R13   | R14   |                       |                    |                                                      |
| miR-106b-5p | 70         | 65   | 53   | 27   | 121  | 52   | 183          | 82   | 121  | 56    | 93   | 140   | 256   | 65                    | 133                | 0.49                                                 |
| miR-140-3p  | 1495       | 2365 | 819  | 1755 | 1740 | 1034 | 4706         | 3705 | 2102 | 2429  | 2178 | 2841  | 4150  | 1535                  | 3159               | 0.49                                                 |
| miR-421     | 0          | 75   | 0    | 27   | 60   | 26   | 27           | 105  | 45   | 148   | 41   | 99    | 8     | 31                    | 68                 | 0.47                                                 |
| miR-200c-3p | 0          | 28   | 18   | 54   | 38   | 26   | 18           | 47   | 38   | 93    | 29   | 124   | 68    | 27                    | 59                 | 0.47                                                 |
| miR-148b-3p | 1425       | 1561 | 730  | 1474 | 1439 | 1862 | 2177         | 3898 | 1641 | 4543  | 1693 | 3516  | 3849  | 1415                  | 3045               | 0.46                                                 |
| miR-576-3p  | 104        | 84   | 18   | 27   | 23   | 0    | 23           | 99   | 23   | 204   | 53   | 140   | 113   | 43                    | 93                 | 0.46                                                 |
| miR-200a-3p | 70         | 19   | 18   | 147  | 75   | 78   | 23           | 99   | 45   | 519   | 64   | 264   | 23    | 68                    | 148                | 0.46                                                 |
| miR-107     | 35         | 196  | 89   | 107  | 196  | 103  | 544          | 146  | 242  | 223   | 210  | 165   | 391   | 121                   | 274                | 0.44                                                 |
| miR-143-3p  | 1217       | 4785 | 1264 | 6149 | 2094 | 6956 | 3576         | 9730 | 2488 | 16486 | 4052 | 11793 | 11284 | 3744                  | 8487               | 0.44                                                 |

|             |      |      |      |      |      |      |      |      |      |      |      |      |      |      |      |      |
|-------------|------|------|------|------|------|------|------|------|------|------|------|------|------|------|------|------|
| miR-101-3p  | 2120 | 2393 | 356  | 2237 | 2471 | 802  | 3453 | 4015 | 3320 | 3449 | 3106 | 3590 | 7149 | 1730 | 4012 | 0.43 |
| miR-425-3p  | 0    | 37   | 107  | 80   | 15   | 26   | 169  | 140  | 38   | 148  | 41   | 107  | 90   | 44   | 105  | 0.43 |
| miR-20a-5p  | 209  | 430  | 18   | 268  | 678  | 362  | 572  | 766  | 824  | 371  | 794  | 651  | 1526 | 327  | 786  | 0.42 |
| miR-30e-5p  | 1008 | 2075 | 1014 | 2291 | 2705 | 2301 | 3018 | 5932 | 4280 | 4673 | 4187 | 4875 | 5473 | 1899 | 4634 | 0.41 |
| miR-186-5p  | 452  | 1794 | 1086 | 1500 | 1650 | 724  | 1907 | 3495 | 2306 | 2726 | 2511 | 3475 | 4270 | 1201 | 2956 | 0.41 |
| miR-15b-3p  | 35   | 28   | 0    | 40   | 113  | 52   | 220  | 99   | 113  | 130  | 88   | 58   | 83   | 45   | 113  | 0.40 |
| miR-126-5p  | 174  | 122  | 53   | 94   | 181  | 155  | 224  | 187  | 151  | 686  | 169  | 404  | 466  | 130  | 327  | 0.40 |
| miR-19b-3p  | 70   | 93   | 53   | 13   | 151  | 52   | 325  | 275  | 113  | 167  | 117  | 173  | 158  | 72   | 190  | 0.38 |
| miR-16-5p   | 348  | 1131 | 107  | 1085 | 1846 | 853  | 5634 | 1823 | 1528 | 1131 | 1588 | 1120 | 3924 | 895  | 2393 | 0.37 |
| miR-1290    | 104  | 47   | 214  | 13   | 38   | 103  | 114  | 76   | 83   | 760  | 93   | 387  | 135  | 87   | 236  | 0.37 |
| miR-16-2-3p | 313  | 879  | 356  | 804  | 1582 | 672  | 1518 | 2174 | 3244 | 1409 | 2972 | 1861 | 1376 | 768  | 2079 | 0.37 |
| miR-3613-5p | 0    | 37   | 36   | 40   | 30   | 78   | 165  | 70   | 76   | 111  | 88   | 82   | 128  | 37   | 103  | 0.36 |

|             |      |      |     |      |      |      |      |      |      |       |      |      |      |      |      |      |
|-------------|------|------|-----|------|------|------|------|------|------|-------|------|------|------|------|------|------|
| miR-130b-5p | 35   | 19   | 36  | 0    | 38   | 52   | 55   | 129  | 45   | 167   | 35   | 140  | 15   | 30   | 84   | 0.36 |
| miR-450a-5p | 0    | 56   | 0   | 40   | 30   | 78   | 9    | 82   | 68   | 241   | 76   | 140  | 53   | 34   | 96   | 0.36 |
| miR-142-5p  | 70   | 252  | 107 | 295  | 362  | 233  | 521  | 549  | 492  | 909   | 473  | 527  | 782  | 220  | 608  | 0.36 |
| miR-27a-3p  | 1112 | 2626 | 570 | 2425 | 1552 | 4215 | 1610 | 5143 | 3002 | 16449 | 2914 | 9182 | 3233 | 2083 | 5933 | 0.35 |
| miR-19a-3p  | 0    | 47   | 36  | 40   | 121  | 26   | 101  | 181  | 136  | 167   | 111  | 107  | 120  | 45   | 132  | 0.34 |
| miR-548o-3p | 0    | 28   | 0   | 13   | 8    | 78   | 14   | 70   | 53   | 148   | 41   | 99   | 38   | 21   | 66   | 0.33 |
| miR-340-5p  | 70   | 355  | 53  | 241  | 241  | 310  | 174  | 660  | 287  | 1484  | 286  | 947  | 707  | 212  | 649  | 0.33 |
| miR-450b-5p | 0    | 37   | 53  | 13   | 8    | 0    | 0    | 29   | 30   | 130   | 47   | 82   | 98   | 19   | 59   | 0.32 |
| miR-142-3p  | 70   | 65   | 18  | 27   | 113  | 26   | 37   | 210  | 151  | 371   | 134  | 214  | 83   | 53   | 171  | 0.31 |
| miR-582-3p  | 0    | 56   | 18  | 94   | 8    | 103  | 41   | 269  | 45   | 389   | 47   | 198  | 83   | 46   | 153  | 0.31 |
| miR-3168    | 104  | 0    | 231 | 0    | 8    | 0    | 96   | 263  | 454  | 74    | 350  | 99   | 45   | 57   | 197  | 0.29 |
| miR-203b-5p | 104  | 150  | 71  | 40   | 68   | 78   | 50   | 111  | 174  | 56    | 485  | 898  | 316  | 85   | 298  | 0.29 |

|             |     |     |     |     |     |     |     |     |      |     |      |     |     |     |     |      |
|-------------|-----|-----|-----|-----|-----|-----|-----|-----|------|-----|------|-----|-----|-----|-----|------|
| miR-96-5p   | 0   | 0   | 0   | 40  | 38  | 0   | 32  | 35  | 106  | 19  | 82   | 16  | 53  | 13  | 49  | 0.28 |
| miR-203a-3p | 104 | 131 | 53  | 40  | 90  | 26  | 46  | 105 | 212  | 37  | 502  | 807 | 278 | 74  | 284 | 0.26 |
| miR-144-3p  | 35  | 122 | 53  | 134 | 392 | 0   | 402 | 193 | 1233 | 148 | 969  | 148 | 346 | 123 | 491 | 0.25 |
| miR-32-5p   | 0   | 47  | 0   | 0   | 38  | 26  | 50  | 58  | 68   | 185 | 64   | 91  | 45  | 18  | 80  | 0.24 |
| miR-374a-5p | 35  | 47  | 0   | 0   | 60  | 0   | 114 | 76  | 106  | 185 | 82   | 91  | 158 | 24  | 116 | 0.21 |
| miR-199b-5p | 0   | 56  | 0   | 27  | 15  | 26  | 18  | 146 | 45   | 278 | 47   | 173 | 30  | 21  | 105 | 0.20 |
| miR-151a-5p | 0   | 28  | 178 | 13  | 83  | 0   | 540 | 64  | 197  | 315 | 158  | 214 | 323 | 50  | 259 | 0.20 |
| miR-15a-5p  | 0   | 0   | 0   | 40  | 15  | 52  | 302 | 29  | 45   | 56  | 47   | 41  | 165 | 18  | 98  | 0.19 |
| let-7a-3p   | 0   | 0   | 0   | 54  | 68  | 103 | 96  | 82  | 242  | 464 | 216  | 288 | 233 | 37  | 232 | 0.17 |
| miR-34c-5p  | 0   | 0   | 0   | 0   | 0   | 26  | 0   | 0   | 121  | 0   | 93   | 0   | 23  | 4   | 34  | 0.15 |
| miR-9-3p    | 0   | 0   | 0   | 0   | 0   | 0   | 0   | 0   | 121  | 19  | 93   | 8   | 15  | 0   | 37  | 0.03 |
| miR-9-5p    | 0   | 28  | 0   | 13  | 15  | 0   | 5   | 12  | 2722 | 0   | 2102 | 8   | 391 | 9   | 749 | 0.01 |

**Table S3.** Responsive > unresponsive in progression group (48 miRNAs of absolute fold change > 2)

|             | Responsive |     | Unresponsive |    |     |     |     | Average (P1, P2) | Average (P5-8, P10) | Fold change<br>{Average(P1, P2)+1/Average(P5-8, P10)+1} |
|-------------|------------|-----|--------------|----|-----|-----|-----|------------------|---------------------|---------------------------------------------------------|
|             | P1         | P2  | P5           | P6 | P7  | P8  | P10 |                  |                     |                                                         |
| miR-499a-5p | 0          | 229 | 0            | 0  | 0   | 0   | 0   | 115              | 0                   | 115.54                                                  |
| miR-6855-5p | 0          | 115 | 0            | 0  | 0   | 0   | 0   | 57               | 0                   | 58.27                                                   |
| miR-409-5p  | 113        | 0   | 0            | 0  | 0   | 0   | 0   | 56               | 0                   | 57.38                                                   |
| miR-4718    | 113        | 0   | 0            | 0  | 0   | 0   | 0   | 56               | 0                   | 57.38                                                   |
| miR-1306-5p | 113        | 115 | 0            | 18 | 0   | 0   | 0   | 114              | 4                   | 24.61                                                   |
| miR-3605-5p | 169        | 0   | 0            | 37 | 0   | 0   | 0   | 85               | 7                   | 10.29                                                   |
| miR-339-5p  | 56         | 458 | 0            | 55 | 0   | 150 | 0   | 257              | 41                  | 6.14                                                    |
| miR-542-3p  | 56         | 172 | 83           | 18 | 0   | 0   | 0   | 114              | 20                  | 5.41                                                    |
| miR-660-5p  | 338        | 115 | 0            | 55 | 0   | 150 | 0   | 226              | 41                  | 5.40                                                    |
| miR-133a-3p | 0          | 344 | 0            | 18 | 0   | 150 | 0   | 172              | 34                  | 4.97                                                    |
| miR-125b-5p | 1804       | 573 | 498          | 37 | 214 | 376 | 182 | 1188             | 261                 | 4.53                                                    |
| miR-204-3p  | 113        | 0   | 0            | 0  | 0   | 0   | 61  | 56               | 12                  | 4.38                                                    |
| miR-151a-5p | 56         | 458 | 166          | 18 | 0   | 0   | 121 | 257              | 61                  | 4.16                                                    |



|             |       |      |      |      |      |      |      |       |      |      |
|-------------|-------|------|------|------|------|------|------|-------|------|------|
| miR-3613-5p | 282   | 229  | 0    | 18   | 0    | 226  | 61   | 255   | 61   | 4.14 |
| miR-28-5p   | 0     | 115  | 0    | 0    | 71   | 0    | 0    | 57    | 14   | 3.82 |
| miR-215-5p  | 620   | 115  | 0    | 37   | 143  | 301  | 0    | 367   | 96   | 3.80 |
| miR-2355-3p | 113   | 0    | 0    | 0    | 71   | 0    | 0    | 56    | 14   | 3.76 |
| miR-9-5p    | 113   | 57   | 0    | 37   | 0    | 75   | 0    | 85    | 22   | 3.68 |
| miR-320c    | 5751  | 172  | 415  | 146  | 1355 | 903  | 1331 | 2961  | 830  | 3.56 |
| miR-29a-3p  | 3214  | 573  | 415  | 274  | 428  | 978  | 666  | 1893  | 552  | 3.42 |
| miR-375-3p  | 2706  | 2119 | 581  | 329  | 1569 | 677  | 363  | 2413  | 704  | 3.42 |
| miR-194-5p  | 1128  | 401  | 166  | 238  | 143  | 451  | 121  | 764   | 224  | 3.40 |
| miR-1228-5p | 226   | 286  | 0    | 91   | 143  | 150  | 0    | 256   | 77   | 3.30 |
| miR-10b-3p  | 113   | 172  | 0    | 0    | 0    | 226  | 0    | 142   | 45   | 3.10 |
| miR-543     | 0     | 115  | 0    | 18   | 0    | 75   | 0    | 57    | 19   | 2.96 |
| miR-335-5p  | 113   | 172  | 0    | 18   | 0    | 226  | 0    | 142   | 49   | 2.88 |
| miR-22-3p   | 15786 | 4753 | 3736 | 1646 | 2996 | 6321 | 3207 | 10270 | 3581 | 2.87 |
| miR-320b    | 10374 | 1203 | 1744 | 787  | 2853 | 1806 | 3146 | 5788  | 2067 | 2.80 |
| miR-130a-3p | 113   | 57   | 0    | 0    | 0    | 150  | 0    | 85    | 30   | 2.77 |
| miR-5010-5p | 56    | 115  | 83   | 18   | 0    | 0    | 61   | 85    | 32   | 2.59 |
| miR-126-5p  | 451   | 687  | 498  | 18   | 71   | 602  | 0    | 569   | 238  | 2.39 |

|             |       |       |       |       |       |       |       |       |       |      |
|-------------|-------|-------|-------|-------|-------|-------|-------|-------|-------|------|
| miR-4508    | 395   | 344   | 166   | 274   | 0     | 150   | 182   | 369   | 154   | 2.38 |
| miR-125a-5p | 395   | 1145  | 830   | 91    | 285   | 301   | 121   | 770   | 326   | 2.36 |
| miR-193a-5p | 1973  | 2291  | 1079  | 750   | 499   | 1204  | 1089  | 2132  | 924   | 2.31 |
| miR-942-5p  | 0     | 229   | 0     | 55    | 0     | 75    | 121   | 115   | 50    | 2.26 |
| miR-206     | 56    | 802   | 664   | 0     | 285   | 0     | 0     | 429   | 190   | 2.25 |
| miR-382-5p  | 169   | 229   | 0     | 110   | 214   | 75    | 61    | 199   | 92    | 2.15 |
| miR-320a-3p | 69516 | 17811 | 24078 | 10995 | 14337 | 20767 | 32490 | 43663 | 20533 | 2.13 |
| miR-3074-5p | 3552  | 1432  | 2242  | 622   | 428   | 2182  | 484   | 2492  | 1192  | 2.09 |
| miR-23a-5p  | 0     | 115   | 0     | 0     | 0     | 75    | 61    | 57    | 27    | 2.07 |
| miR-625-3p  | 169   | 401   | 83    | 201   | 0     | 226   | 182   | 285   | 138   | 2.05 |
| miR-107     | 282   | 344   | 166   | 91    | 143   | 301   | 61    | 313   | 152   | 2.05 |
| miR-500a-3p | 395   | 115   | 166   | 55    | 143   | 75    | 182   | 255   | 124   | 2.04 |
| miR-23b-3p  | 507   | 344   | 332   | 293   | 71    | 226   | 121   | 426   | 209   | 2.04 |
| miR-140-5p  | 169   | 458   | 249   | 146   | 0     | 376   | 0     | 314   | 154   | 2.03 |
| miR-130b-5p | 0     | 115   | 0     | 18    | 0     | 0     | 121   | 57    | 28    | 2.02 |
| let-7a-3p   | 169   | 115   | 166   | 37    | 71    | 75    | 0     | 142   | 70    | 2.02 |
| miR-150-5p  | 113   | 1145  | 581   | 329   | 0     | 527   | 121   | 629   | 312   | 2.02 |

**Table S4.** Unresponsive > responsive in progression group (61 miRNAs of absolute fold change < 0.5)

|             | Responsive |       | Unresponsive |       |        |       |        | Average (P1, P2) | Average (P5-8, P10) | Fold change<br>{Average(P1, P2)+1/Average(P5-8, P10)+1} |
|-------------|------------|-------|--------------|-------|--------|-------|--------|------------------|---------------------|---------------------------------------------------------|
|             | P1         | P2    | P5           | P6    | P7     | P8    | P10    |                  |                     |                                                         |
| miR-203b-5p | 56         | 172   | 747          | 18    | 143    | 226   | 61     | 114              | 239                 | 0.48                                                    |
| miR-576-5p  | 0          | 57    | 83           | 0     | 71     | 150   | 0      | 29               | 61                  | 0.48                                                    |
| miR-10a-3p  | 56         | 0     | 0            | 0     | 0      | 301   | 0      | 28               | 60                  | 0.48                                                    |
| miR-148a-3p | 27851      | 36997 | 47908        | 95220 | 109130 | 41159 | 50036  | 32424            | 68690               | 0.47                                                    |
| miR-122-5p  | 49727      | 36080 | 15692        | 79890 | 116120 | 66215 | 184414 | 42903            | 92466               | 0.46                                                    |
| miR-335-3p  | 0          | 57    | 83           | 18    | 143    | 75    | 0      | 29               | 64                  | 0.46                                                    |
| miR-30a-3p  | 226        | 57    | 1245         | 73    | 71     | 150   | 61     | 141              | 320                 | 0.44                                                    |
| miR-200a-3p | 507        | 57    | 1744         | 55    | 642    | 752   | 61     | 282              | 651                 | 0.43                                                    |
| miR-145-5p  | 0          | 57    | 166          | 37    | 0      | 75    | 61     | 29               | 68                  | 0.43                                                    |
| miR-15a-5p  | 56         | 0     | 83           | 55    | 71     | 150   | 0      | 28               | 72                  | 0.40                                                    |
| miR-17-5p   | 113        | 115   | 498          | 146   | 214    | 451   | 121    | 114              | 286                 | 0.40                                                    |
| miR-127-3p  | 0          | 515   | 0            | 1079  | 1498   | 376   | 303    | 258              | 651                 | 0.40                                                    |
| miR-196b-5p | 0          | 57    | 332          | 37    | 0      | 0     | 0      | 29               | 74                  | 0.40                                                    |

|             |      |      |      |      |       |      |      |      |      |      |
|-------------|------|------|------|------|-------|------|------|------|------|------|
| miR-3158-3p | 56   | 172  | 83   | 585  | 285   | 75   | 424  | 114  | 291  | 0.39 |
| miR-345-5p  | 169  | 0    | 415  | 165  | 0     | 226  | 303  | 85   | 222  | 0.38 |
| miR-125a-3p | 0    | 57   | 0    | 55   | 214   | 0    | 121  | 29   | 78   | 0.38 |
| miR-671-3p  | 0    | 57   | 166  | 55   | 0     | 75   | 121  | 29   | 83   | 0.35 |
| miR-3529-3p | 113  | 344  | 332  | 677  | 1427  | 527  | 303  | 228  | 653  | 0.35 |
| miR-20b-5p  | 56   | 0    | 83   | 37   | 71    | 226  | 0    | 28   | 83   | 0.35 |
| miR-7-5p    | 226  | 229  | 581  | 677  | 1427  | 602  | 121  | 227  | 682  | 0.33 |
| miR-365a-5p | 0    | 57   | 0    | 18   | 214   | 150  | 61   | 29   | 89   | 0.33 |
| miR-1246    | 1240 | 2749 | 7971 | 1756 | 17190 | 1053 | 5748 | 1995 | 6744 | 0.30 |
| miR-7704    | 56   | 0    | 249  | 37   | 214   | 0    | 0    | 28   | 100  | 0.29 |
| miR-200c-3p | 677  | 115  | 5563 | 128  | 428   | 752  | 0    | 396  | 1374 | 0.29 |
| miR-339-3p  | 0    | 115  | 249  | 220  | 0     | 150  | 424  | 57   | 209  | 0.28 |
| miR-210-3p  | 0    | 57   | 83   | 37   | 214   | 75   | 121  | 29   | 106  | 0.28 |
| miR-200b-3p | 282  | 115  | 3902 | 91   | 214   | 301  | 0    | 198  | 902  | 0.22 |
| miR-1843    | 0    | 57   | 249  | 128  | 71    | 226  | 0    | 29   | 135  | 0.22 |
| miR-664a-5p | 56   | 0    | 249  | 165  | 0     | 75   | 242  | 28   | 146  | 0.20 |
| miR-429     | 56   | 0    | 664  | 0    | 71    | 75   | 0    | 28   | 162  | 0.18 |
| miR-4488    | 56   | 0    | 332  | 73   | 214   | 301  | 0    | 28   | 184  | 0.16 |

|              |     |     |      |     |      |     |      |     |      |      |
|--------------|-----|-----|------|-----|------|-----|------|-----|------|------|
| miR-203a-3p  | 56  | 115 | 2823 | 37  | 143  | 301 | 61   | 85  | 673  | 0.13 |
| miR-1290     | 282 | 115 | 2740 | 421 | 5635 | 226 | 1634 | 198 | 2131 | 0.09 |
| miR-184      | 56  | 0   | 1827 | 18  | 357  | 75  | 363  | 28  | 528  | 0.06 |
| miR-6511b-5p | 0   | 0   | 0    | 0   | 0    | 0   | 121  | 0   | 24   | 0.04 |
| miR-6734-3p  | 0   | 0   | 0    | 0   | 0    | 0   | 121  | 0   | 24   | 0.04 |
| miR-3690     | 0   | 0   | 0    | 0   | 143  | 0   | 0    | 0   | 29   | 0.03 |
| miR-708-3p   | 0   | 0   | 0    | 0   | 143  | 0   | 0    | 0   | 29   | 0.03 |
| miR-17-3p    | 0   | 0   | 0    | 0   | 0    | 150 | 0    | 0   | 30   | 0.03 |
| miR-505-3p   | 0   | 0   | 0    | 0   | 0    | 150 | 0    | 0   | 30   | 0.03 |
| miR-455-5p   | 0   | 0   | 0    | 18  | 143  | 0   | 0    | 0   | 32   | 0.03 |
| miR-296-5p   | 0   | 0   | 166  | 0   | 0    | 0   | 0    | 0   | 33   | 0.03 |
| miR-5588-5p  | 0   | 0   | 166  | 0   | 0    | 0   | 0    | 0   | 33   | 0.03 |
| miR-1304-3p  | 0   | 0   | 0    | 0   | 0    | 75  | 121  | 0   | 39   | 0.02 |
| miR-363-5p   | 0   | 0   | 83   | 0   | 0    | 0   | 121  | 0   | 41   | 0.02 |
| miR-92b-5p   | 0   | 0   | 0    | 37  | 0    | 0   | 182  | 0   | 44   | 0.02 |
| miR-340-3p   | 0   | 0   | 83   | 0   | 0    | 150 | 0    | 0   | 47   | 0.02 |
| miR-1269a    | 0   | 0   | 249  | 0   | 0    | 0   | 0    | 0   | 50   | 0.02 |
| miR-485-5p   | 0   | 0   | 0    | 37  | 143  | 75  | 0    | 0   | 51   | 0.02 |

|              |   |   |     |     |     |     |     |   |     |      |
|--------------|---|---|-----|-----|-----|-----|-----|---|-----|------|
| miR-454-5p   | 0 | 0 | 166 | 18  | 71  | 0   | 0   | 0 | 51  | 0.02 |
| miR-574-5p   | 0 | 0 | 83  | 55  | 0   | 0   | 121 | 0 | 52  | 0.02 |
| miR-1273h-5p | 0 | 0 | 0   | 18  | 0   | 0   | 242 | 0 | 52  | 0.02 |
| miR-200a-5p  | 0 | 0 | 249 | 0   | 71  | 0   | 0   | 0 | 64  | 0.02 |
| miR-200b-5p  | 0 | 0 | 249 | 18  | 0   | 0   | 61  | 0 | 66  | 0.02 |
| miR-1307-5p  | 0 | 0 | 0   | 37  | 71  | 226 | 0   | 0 | 67  | 0.01 |
| miR-370-3p   | 0 | 0 | 0   | 220 | 71  | 0   | 61  | 0 | 70  | 0.01 |
| miR-381-3p   | 0 | 0 | 0   | 256 | 143 | 0   | 0   | 0 | 80  | 0.01 |
| miR-582-3p   | 0 | 0 | 166 | 183 | 0   | 0   | 121 | 0 | 94  | 0.01 |
| miR-148a-5p  | 0 | 0 | 83  | 91  | 143 | 0   | 182 | 0 | 100 | 0.01 |
| miR-3168     | 0 | 0 | 0   | 256 | 0   | 0   | 666 | 0 | 184 | 0.01 |
| miR-4433b-3p | 0 | 0 | 166 | 165 | 214 | 301 | 242 | 0 | 218 | 0.00 |
